# Supplementary material
Source: PubMed Central journal article supplement (PMC3736591)
Supplement: NIHMS363300-supplement-Supplemental_materials.pdf [file NIHMS363300-supplement-Supplemental_materials.pdf]

Supplemental Table 1. Primers used in this study

| Primer name | Sequence (5' – 3')                                 |
|-------------|----------------------------------------------------|
| M13F        | GTAAAACGACGGCCAG                                   |
| M13R        | CAGGAAACAGCTATGAC                                  |
| JH12497     | GGCCCGGGATGGGCGGCTGTATGTCTACTCCAGAAG               |
| JH12498     | GGCCCGGGAACATCCGCCAGTCAGACAGGAG                    |
| JH12499     | CATTCATATGTTTCGATGTCGGTGGACTGAGAAGCGAGAGAAAGAAGTGG |
| JH12500     | CCACTTCTTTCTCTCGCTTCTCAGTCCACCGACATCGAACATATGAATG  |
| JH13272     | TTCAGGCTGCGCAACTGTTG                               |
| JH14774     | AAGAGATCCCGCAAGAGATCTTC                            |
| JH14775     | CCGACAACGCTACGGTGATGAC                             |
| JH14776     | CTGGCCGTCGTTTTACCATGTTGGCATGCCCATGAGCTG            |
| JH14777     | GTCATAGCTGTTTCTGGAACACAGTCATCGTCGTGAAG             |
| JH14778     | GTTGAGTGAGTCGCCTTACGCATG                           |
| JH14779     | CCTTACAGGAGTACTGGACAG                              |
| JH14780     | GCGACTAATCTGACAATGCTTC                             |
| JH14786     | GTCACTCGCTCTCGCTGCCTTG                             |
| JH14787     | CCTCCCGAGAGTTCGACAATC                              |
| JH14788     | TTTCTGCACAATATTTCAAGC                              |
| JH14789     | CTTGACGAAAATCTGCATGG                               |
| JH14790     | TGGCATGCATGTGCTCTG                                 |
| JH14791     | GTAAGGTGGACTCCTTCT                                 |
| JH17098     | GACTGGATCCGAATGGCAGAAAGCAACGAGAAG                  |
| JH17099     | GATCCTGCAGATCTACAGTCTCTGACCGGGGAC                  |
| JH17832     | GGACTGGGTAAGTTTCTTCCTG                             |
| JH17833     | CTGGCCGTCGTTTTACGTGGAACGCAATGCGAATGTAG             |
| JH18001     | GTACGGCCGGCCATGGCAGAAAGCAACGAGAAG                  |
| JH18002     | GCATTTAATTAACACTACAGTCTCTGACCGGGGAC                |
| JH18786     | GTACGGCCGGCCGGCCATTACGGCCAGATGGCAGAAAGCAACGAGAAG   |
| JH18787     | GCATTTAATTAAGGCCGAGGGCGGCCACCTACAGTCTCTGACCGGGGAC  |
| JH18831     | CTGTCCAGTACCTCCTGTAAGG                             |
| JH18832     | CCTGCAATGTCTCTGAAACCAC                             |
| JH18838     | GATCCTGCAGATTTACAGGGGAGTAAGATTGGCAAAG              |
| JH19001     | GACTCCCGGGTATGGGCGGCTGTATGTCTACTC                  |
| JH19002     | GATCCTCGAGTTATAAGATAACCAGAGTCACGTAAAG              |
| JH20163     | GCTTTCAGCGTAATCTAGTCTATTACAG GGGAGTAAGATTGGCAAAG   |

---

|         |                                                  |
|---------|--------------------------------------------------|
| JH20164 | CTTTGCCAATCTTACTCCCCTGTAATAGACTAGATTACGCTGAAAGC  |
| JH20165 | TCTAGTCTA TTA GAGGACGACGCACAGGGGAGTAAGATTGGCAAAG |
| JH20166 | ACTCCCCTG TCGTCGTCCTC TAA TAGACTAGATTACGCTGAAAGC |
| JH20181 | GTCATAGCTGTTTCCTGCATGATTACGCCAAGCTTGCATG         |

---

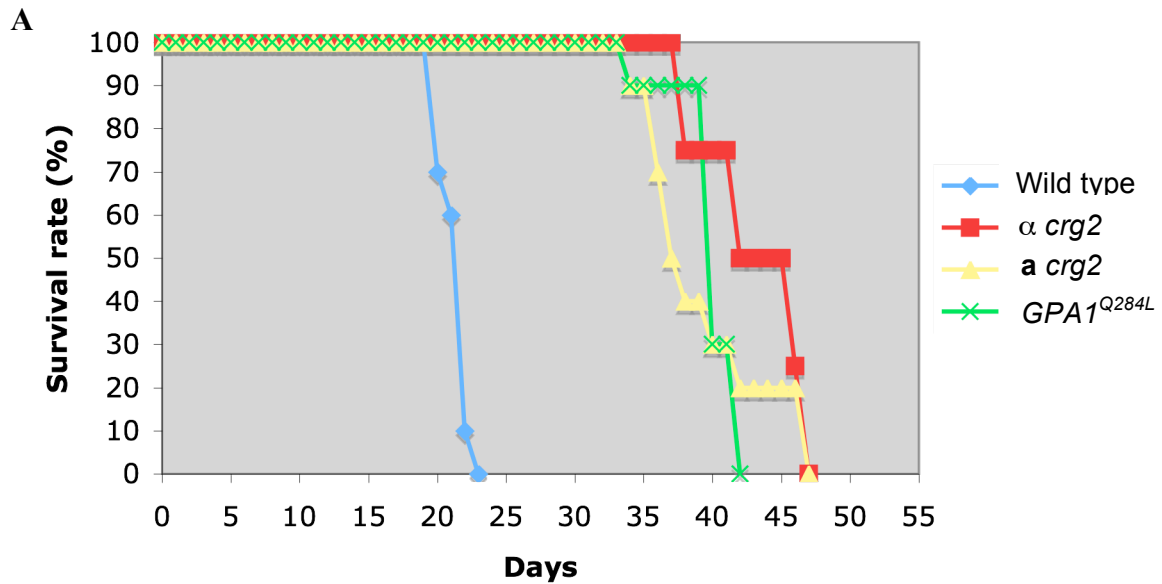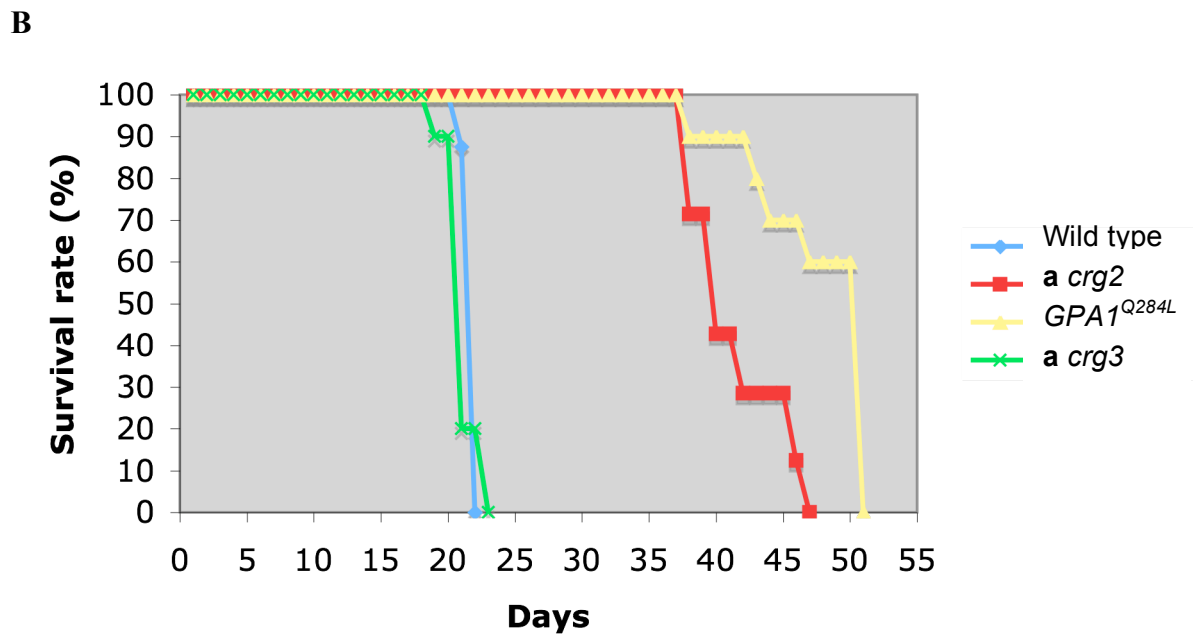

**Supplemental Figure S1. Crg2 regulates virulence in a murine inhalation model.**

Female A/Jcr mice were intranasally inoculated with  $10^5$  cells of the following strains in two separate experiments: (A) wild type (H99),  $\alpha$  *crg2* mutant 1 (CDX50), *a crg2* mutant 2 (CDX51), *GPA1*<sup>Q284L</sup> strain 2 (CDX156-4); (B) wild type (H99), *a crg2* mutant 3 (CDX111), *GPA1*<sup>Q284L</sup> strain 3 (CDX40), and *crg3* mutant (CDX53). Animals were

monitored for clinical signs of cryptococcal infection and sacrificed at predetermined clinical end points that predict imminent mortality. All *crg2* mutants and *GPAI*<sup>Q284L</sup> strains tested showed significantly reduced virulence compared to the wild type strain H99 (P<0.001) based on the PRISM 4 program 4.0 (Graph Software, San Diego, CA).

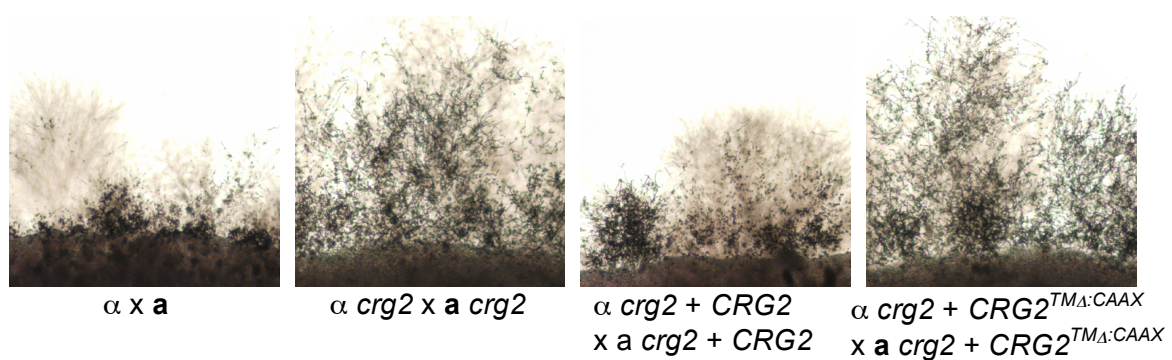

**Supplementary Figure S2: Function of transmembrane domains in sexual**

**reproduction of Crg2 protein.** Bilateral matings for the following strains were

performed on V8 medium: wild type (H99 and KN99a), *crg2* (CDX50 and CDX51), *crg2* + *CRG2* (CDX180 and CDX181),  $\alpha \text{ crg2} + \text{CRG2}^{\text{TM}\Delta:\text{CAAX}}$  (CDX184 and CDX185).

Mating results on V8 medium were photographed after 10 days of incubation in the dark at 25°C.
